# Supplementary material
Source: publisher site journal article supplement (https://bdj.pensoft.net/article/download/suppl/4994468/)
Supplement: Supplementary file

### Supplemental 3: Ontology competency questions, user domains or groups, and example use cases

This document is supplemental information for Stucky et al. (2019) \_\_\_\_\_.

**Table S1.** Ontology competency questions and relevant ontology concept areas for each question. Key to concept area numbers: **1)** observations and observing processes; **2)** relationships and interactions; **3)** single-organism behaviors; **4)** ontogeny; **5)** organism products and traces; **6)** habitat, locality, and substrates; **7)** positional and spatial information; **8)** weather and climate; **9)** collecting methods; **10)** curation. For more information about these concept areas, see Table 1 in the main article.

| Competency question                                                                                                                     | Concept area(s) |
|-----------------------------------------------------------------------------------------------------------------------------------------|-----------------|
| 1. What all is known about the natural history of species <i>X</i> ?                                                                    | 2-8             |
| 2. What natural history observations do we have for species <i>X</i> in North America?                                                  | 2-8             |
| 3. What are the positive, negative, and neutral biotic interactions observed for species of the genus <i>X</i> ?                        | 2               |
| 4. Toward which species is species <i>X</i> antagonistic?                                                                               | 2               |
| 5. Given a list of species from some community, how do these species interact with each other?                                          | 2               |
| 6. If species <i>X</i> were to become locally extinct, what other species might be impacted?                                            | 2               |
| 7. Which insect species might be conserved if a piece of forest with tree species <i>X</i> , <i>Y</i> , and <i>Z</i> is preserved?      | 2               |
| 8. Which species visit flowers of the genus <i>X</i> ?                                                                                  | 2               |
| 9. Which insect species of the family <i>X</i> are associated with trees?                                                               | 2               |
| 10. Which species of the genus <i>X</i> have not been found on flowers?                                                                 | 2               |
| 11. Near which tree species does species <i>X</i> engage in courtship behaviors?                                                        | 2, 3, 6, 7      |
| 12. Are all occurrences of species <i>X</i> associated with plant species <i>Y</i> ?                                                    | 2               |
| 13. Which species of the order <i>X</i> have been observed laying eggs on a plant species on which they have not been observed feeding? | 2               |
| 14. What predator/prey interactions have been observed in state park <i>X</i> ?                                                         | 1, 2            |
| 15. What specimens are associated with observations of predation by species <i>X</i> , and where are they located?                      | 1, 2, 10        |
| 16. From which host life stages has parasitoid species <i>X</i> emerged?                                                                | 2, 4            |
| 17. Which species of the genus <i>X</i> are parasitized by the species <i>Y</i> ?                                                       | 2               |
| 18. From which species have species of the genus <i>X</i> emerged?                                                                      | 2               |
| 19. Which host associations for the parasitoid species <i>X</i> are supported by at least 3 different observers?                        | 1, 2            |
| 20. Are there parasitoids of hyperparasitoids?                                                                                          | 2               |
| 21. What species of insects have been found in two or more hosts from different taxonomic orders?                                       | 2               |
| 22. On eggs of which species has parasitoid species <i>X</i> been found?                                                                | 2               |
| 23. What does species <i>X</i> eat?                                                                                                     | 2               |

| <b>Competency question</b>                                                             | <b>Concept area(s)</b> |
|----------------------------------------------------------------------------------------|------------------------|
| 24. What are all the food sources for lab rearing of species X?                        | 2, 4                   |
| 25. What predators eat species X?                                                      | 2                      |
| 26. Does species X eat carrion?                                                        | 2                      |
| 27. Do insects ever eat hummingbirds?                                                  | 2                      |
| 28. Which species farm fungus X?                                                       | 2                      |
| 29. Where does species X lay its eggs?                                                 | 2, 6, 7                |
| 30. When does species X lay its eggs?                                                  | 1, 8                   |
| 31. Which insects are found on insects that are found on carrion?                      | 2, 6, 7                |
| 32. Which species of the family X have larvae associated with species of the family Y? | 2                      |
| 33. On which parts of the human body have bot flies been found?                        | 2, 6, 7                |
| 34. Which ant species are known to sting humans?                                       | 2                      |
| 35. What are the northern-most records of insects feeding on humans?                   | 1, 2                   |
| 36. Which species of the order X have been collected in houses in Florida?             | 6, 7                   |
| 37. Which insect species have been found on human remains?                             | 2                      |
| 38. What are potential natural controls of potential pests of crop X?                  | 2                      |
| 39. What are the potential vectors of crop disease X?                                  | 2                      |
| 40. Which species of the order X parasitize mammals in Africa?                         | 1, 2                   |
| 41. Does species X make a cocoon?                                                      | 4, 5                   |
| 42. What do we know about the development of species X?                                | 4                      |
| 43. Is there developmental information about species X from lab rearings?              | 4                      |
| 44. What is known about the development time of species X?                             | 4                      |
| 45. Which species of genus X are found in tropical lowland forests?                    | 6                      |
| 46. Which insect genera are found in both forests and deserts?                         | 6                      |
| 47. Which species are found in biome X?                                                | 6                      |
| 48. Under what temperature regimes do fireflies signal?                                | 3, 8                   |
| 49. Which species in family X are nocturnal?                                           | 1, 9                   |
| 50. Has species X been collected at lights?                                            | 9                      |
| 51. Which non-target species are collected in pheromone traps for species X?           | 9                      |
| 52. If I want to observe/collect species X, what methods should I use?                 | 2, 6-9                 |

**Table S2.** Ontology user domains or groups, example use cases, and the most relevant competency questions for each use case. Competency question numbers correspond with the question numbers in Table S1.

| <b>User domain/group</b>                             | <b>Example use cases</b>                          | <b>Relevant competency questions</b>                                            |
|------------------------------------------------------|---------------------------------------------------|---------------------------------------------------------------------------------|
| Entomology                                           | Developmental studies                             | 1, 41-44, 52                                                                    |
|                                                      | Forensic entomology                               | 23, 26, 37, 42                                                                  |
|                                                      | Insect collecting and rearing                     | 1, 2, 8-13, 16-19, 22, 24, 26, 29-32, 40, 42-45, 47, 49-52                      |
|                                                      | Medical and veterinary entomology                 | 18, 33-36, 40                                                                   |
|                                                      | Natural history studies                           | 1, 2, 4, 5, 8-13, 15-32, 40-50, 52                                              |
| Taxonomy and systematics                             | Authoring field guides                            | 1, 2, 8, 9, 12, 16, 18, 22, 23, 26, 29, 30, 40, 41, 45, 49                      |
|                                                      | Generating checklists/catalogues                  | 1, 2, 9, 12, 16, 18, 22, 23, 26, 29, 30, 41, 45, 47, 49                         |
|                                                      | Systematic revisions                              | 1, 2, 9, 12, 16, 18, 22, 23, 26, 29, 30, 41, 45, 49                             |
| Ecology and evolutionary biology                     | Community ecology                                 | 3-18, 20-23, 25, 26, 28-32, 40, 45, 47                                          |
|                                                      | Comparative analyses                              | 2, 8-12, 15-19, 21-23, 26, 28-32, 40, 41, 45-49                                 |
|                                                      | Disease ecology                                   | 35, 39, 40                                                                      |
|                                                      | Ecosystem ecology                                 | 3-5, 9, 10, 23, 25, 32, 45-47                                                   |
|                                                      | Evolutionary ecology                              | 2, 8-12, 15-19, 21-23, 26, 28-32, 40, 41, 45-49                                 |
| Conservation biology and natural resource management | Ecological restoration                            | 1, 3, 5, 6, 12, 23, 29, 45-47                                                   |
|                                                      | Environmental monitoring                          | 31, 45, 47-52                                                                   |
|                                                      | Habitat preservation decisions                    | 5-7, 9, 11, 12, 14, 23, 29, 45, 47                                              |
|                                                      | Predicting trophic/extinction cascades            | 3-7, 12, 23, 25                                                                 |
| Agriculture and forestry                             | Finding potential biological control agents       | 4, 15-19, 21-25, 32, 38                                                         |
|                                                      | Finding potential disease vectors                 | 4, 18, 23, 24, 35, 36, 39, 40                                                   |
|                                                      | Finding potential pest insects                    | 4, 12, 13, 18, 23, 24, 29, 35, 36, 38-40                                        |
| Education                                            | Classroom education                               | 1-6, 8-12, 16-18, 20-27, 29-31, 33-37, 40-42, 45-49, 52                         |
|                                                      | Public outreach                                   | 1, 2, 6, 8-10, 12, 14, 17, 18, 22, 23, 27, 29, 30, 33-36, 38-40, 45, 47, 48, 52 |
| General public                                       | Finding potential garden pests and control agents | 4, 8, 12, 16-19, 22-24, 29, 32, 38, 39                                          |
|                                                      | Insect collecting and rearing                     | 1, 2, 8-13, 16-19, 22, 24, 26, 29-32, 40, 42-45, 47, 49-52                      |
|                                                      | Natural history studies                           | 1, 2, 4, 5, 8-13, 15-32, 40-50, 52                                              |
